# Supplementary material
Source: PubMed Central journal article supplement (PMC3684169)
Supplement: NIHMS480197-supplement-Supplemental.pdf [file NIHMS480197-supplement-Supplemental.pdf]

## SUPPLEMENTARY INFORMATION

### **Tudor domain ERI-5 tethers an RNA-dependent RNA polymerase to DCR-1 to potentiate endo-RNAi**

Caroline Thivierge<sup>1,2,6</sup>, Neetha Makil<sup>1,2,6</sup>, Mathieu Flamand<sup>1,2</sup>, Jessica J. Vasale<sup>3</sup>, Craig C. Mello<sup>3,4</sup>, James Wohlschlegel<sup>5</sup>, Darryl Conte Jr.<sup>3</sup> & Thomas F. Duchaine<sup>1,2</sup>

<sup>1</sup>Department of Biochemistry, McGill University, Montreal, Quebec, H3G 1Y6, Canada. <sup>2</sup>Goodman Cancer Center, McGill University, Montreal, Quebec, H3G 1Y6, Canada. <sup>3</sup>Program in Molecular Medicine, University of Massachusetts Medical School, 373 Plantation Street, Suite 219, Worcester, Massachusetts, 01605, USA. <sup>4</sup>Howard Hughes Medical Institute, University of Massachusetts Medical School, 373 Plantation Street, Suite 219, Worcester, Massachusetts 01605, USA. <sup>5</sup>Department of Biological Chemistry, David Geffen School of Medicine, University of California Los Angeles, Los Angeles, California 90095, USA. <sup>6</sup>These authors contributed equally. Correspondence should be addressed to T.F.D. ([thomas.duchaine@mcgill.ca](mailto:thomas.duchaine@mcgill.ca)).

## Supplementary Figure-1

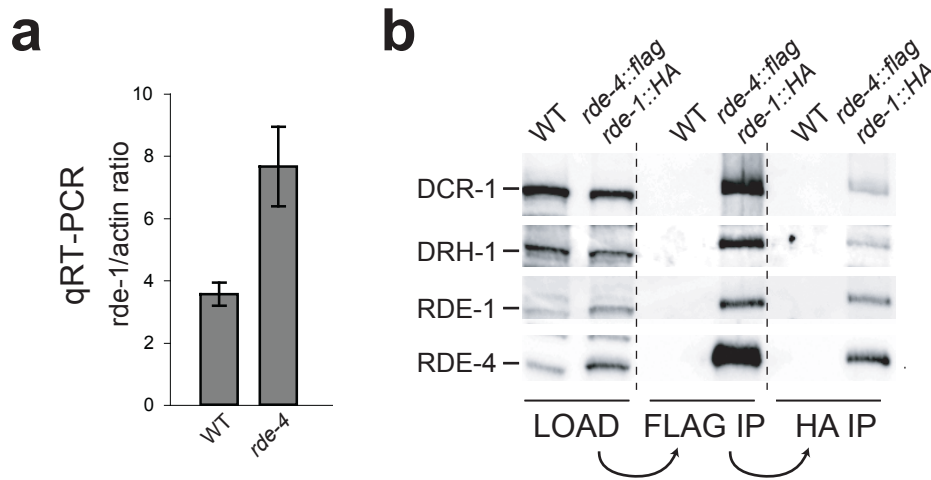

### Supplementary Figure 1.

Distinct DCR-1 complexes initiate endo- and exoRNAi.

**(a)** Expression of *rde-1* mRNA by qRT-PCR analysis. Total RNA from wild-type (WT) and *rde-4* mutant embryos were used. *Rde-1* mRNA levels were normalized to an actin control. Results are presented as the mean from triplicate samples and error bars represent sd.

**(b)** FLAG, HA sequential IP in WT and *rde-4::flag; rde-1::HA* double mutant embryos. DCR-1, DRH-1, RDE-1 and RDE-4 proteins were detected by western blot.

## Supplementary Figure-2

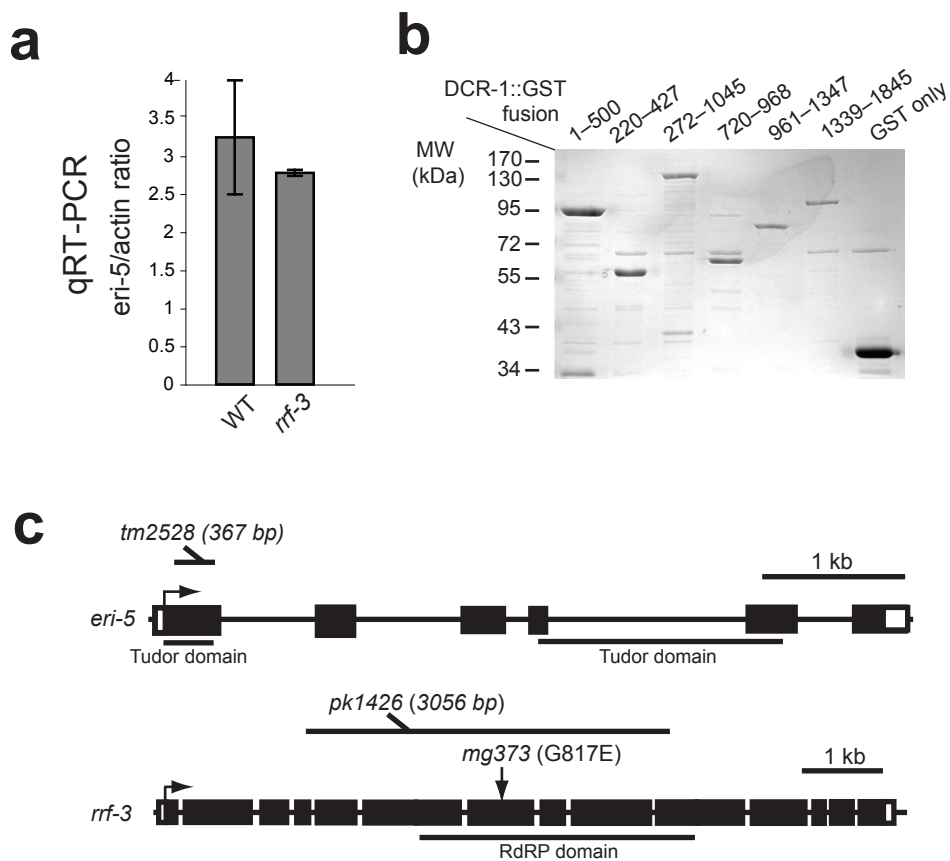

### Supplementary Figure 2.

ERI-5 recruits an RdRP module to DCR-1 N-terminus.

(a) Shown is the expression profile of *eri-5* mRNA by qRT-PCR analysis. Total RNA from WT and *rrf-3* (*pk1426*) mutant embryos were used. *Eri-5* mRNA levels were normalized to an actin control. Results are presented as the mean from triplicate samples and error bars represent standard deviation.

(b) Coomassie Blue gel staining showing purified DCR-1-GST fusion proteins.

(c) Schematic representation of *eri-5* (*tm2528*) and *rrf-3* (*pk1426*) deletion mutants and *rrf-3* (*mg373*) point mutant.

# Supplementary Figure-3

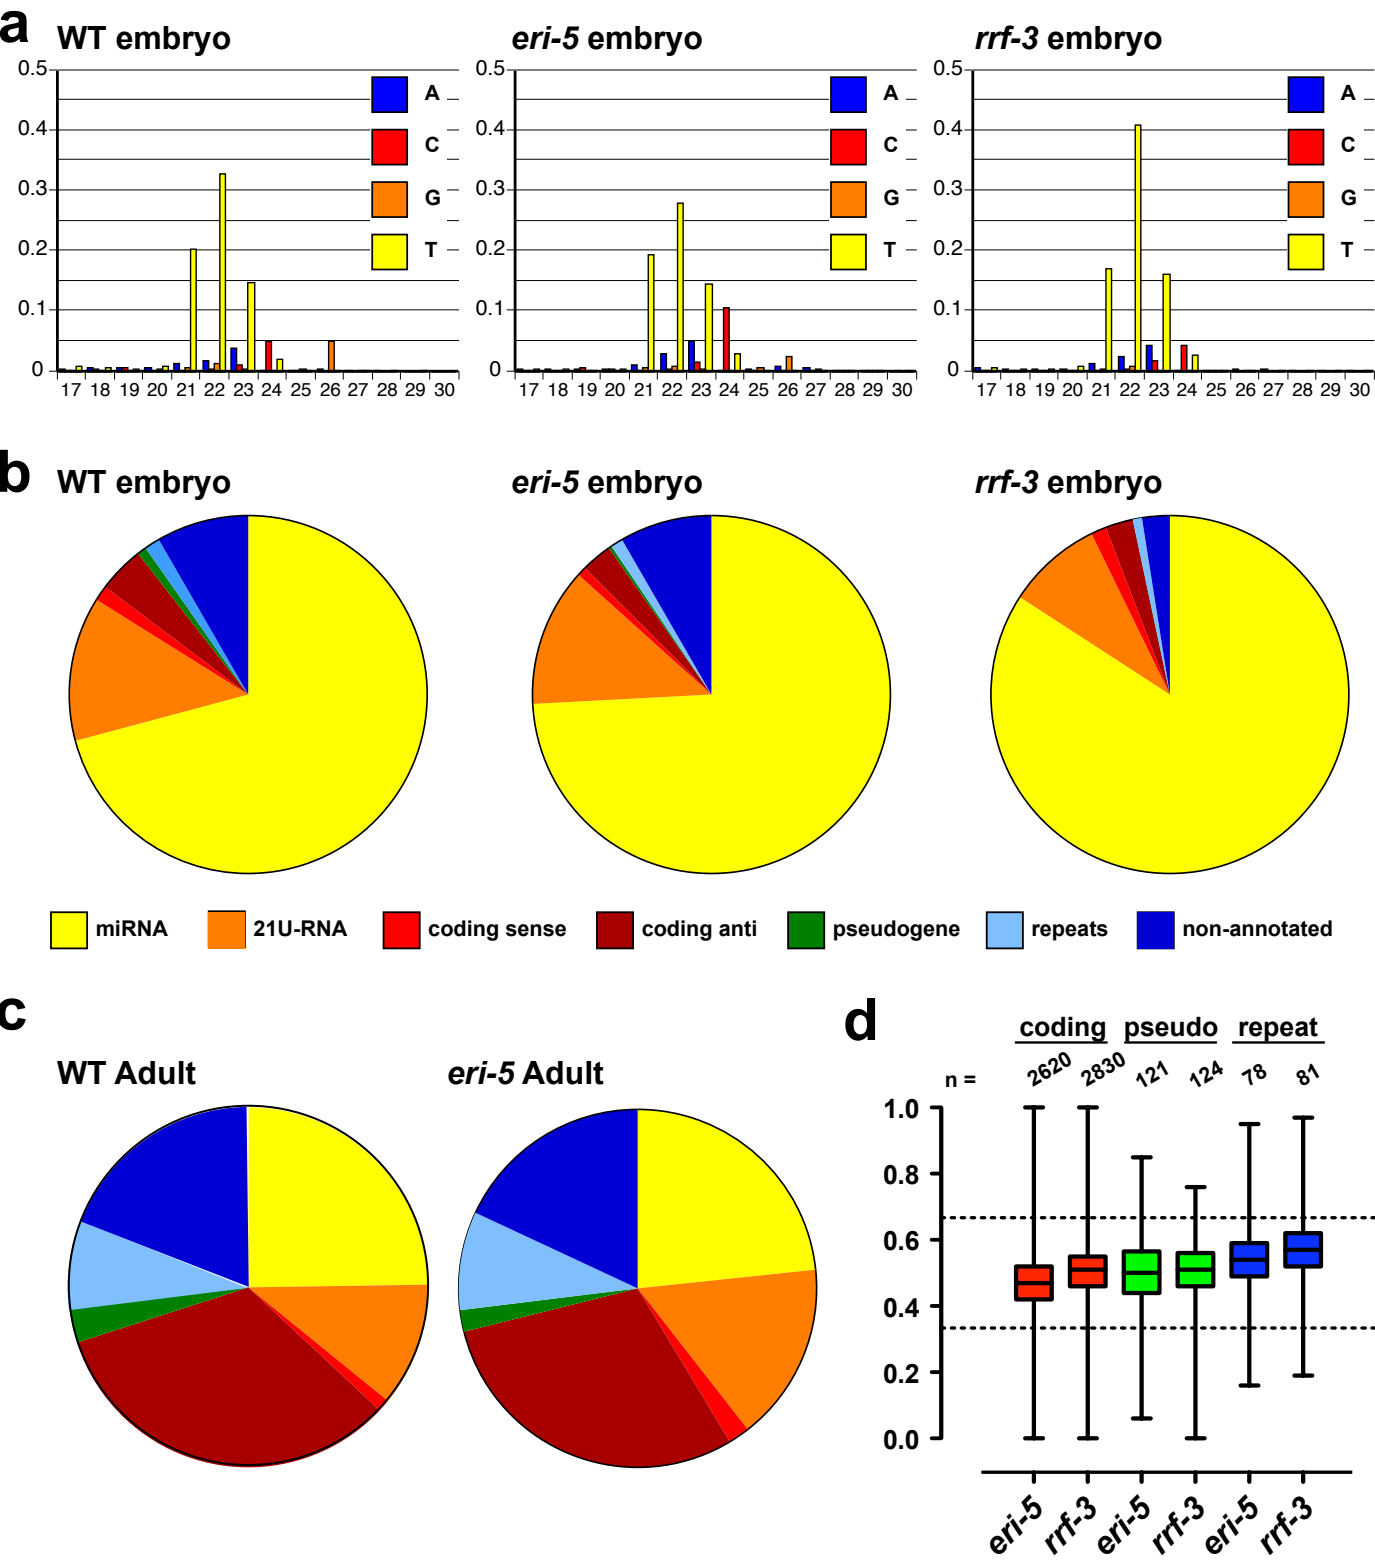

### Supplementary Figure 3.

Deep sequencing analysis of *eri-5* mutant.

(a) Length and first nucleotide distribution of small RNAs cloned from wild-type (WT), *eri-5* and *rrf-3* embryos. The y-axis represents the fraction of total normalized reads. The x-axis represents the read length in nucleotides (nt). Note that 26nt reads starting with a 5'G represent ~5% in WT, ~2.5% in *eri-5*, and ~0.05% in *rrf-3*.

(b) Pie charts showing the distribution of genome matching reads in the small RNA libraries prepared from WT, *eri-5* and *rrf-3* mutant embryos.

(c) Pie charts showing the distribution of genome matching 22G-RNA reads in the small RNA libraries prepared from WT and *eri-5* adults. The WT sample was previously published (Gu et al., 2009).

(d) Box and whisker plots showing 22G-RNAs that are not downstream of the ERI endo-RNAi pathway are unaffected in *eri-5* and *rrf-3* mutants. These loci include protein coding genes, pseudogenes and transposons (repeats) as described (Gu et al., 2009).

See legend of Figure 3 for description of box and whisker plots. The number of loci used to generate each box-and-whisker plot is indicated above each plot and the data are provided in Supplementary Table 2.

## Supplementary Figure-4

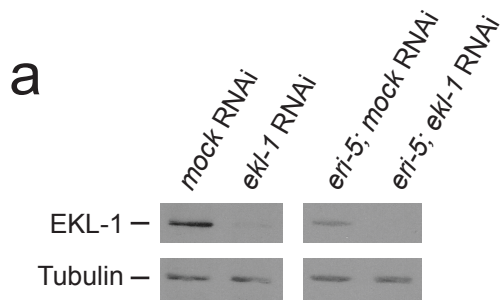

### Supplementary Figure 4.

ERI-5 potentiates ERI endoRNAi small RNA biogenesis.

(a) *Ekl-1* RNAi efficiency in *C.elegans* mock RNAi (*sel-1*), *ekl-1* RNAi, *eri-5*; mock RNAi (*sel-1*) and *eri-5*; *ekl-1* RNAi embryos. EKL-1 protein knock-down was determined by western blot and tubulin was used as a loading control.

## Supplementary Results:

### Coupled stability of the RDE complex components (see Fig. 1b).

Unexpectedly, when *dcr-1*<sup>-/-</sup> extracts were probed by western blot, neither RDE-1 nor DRH-1 could be detected. Similarly, when *rde-4* extracts were probed, RDE-1 could barely be detected. The reduction in the expression of RDE-1 was not complete, and low levels of RDE-1 expression could still be detected in the *dcr-1*<sup>-/-</sup> background, but only when enriched from an RDE-4 IP. This coupling in protein expression is likely to occur at the level of protein stability, as the mRNA levels for *rde-1* were in fact increased in the *rde-4* genotype (Supplementary Fig.1a). No RDE-1 interaction with DRH-1 or DCR-1 was detected in the *rde-4* background (Figure 1B DRH-1 and DCR-1 IP panels, *rde-4* lane). The interaction between DRH-1 and DCR-1 remained unaffected in the *rde-1* and *rde-4* backgrounds, and interaction between RDE-1 and RDE-4 could still be detected in the *dcr-1* genotype (which also lacks DRH-1, see below). In addition, RDE-4 could still interact with DCR-1 in the *rde-1* background (Fig. 1b RDE-4, DRH-1 and DCR-1 IP panels, *rde-1*, *rde-4*, *dcr-1* lanes). Together, these results indicate that RDE-1 is stabilized and recruited to DCR-1 via its interaction with RDE-4, and independently of DRH-1, but that they assemble within a common complex.

## **Supplementary Methods:**

**Real-time PCR** For mRNA analysis of *eri-5* and *rde-1*, real-time PCR was performed as described in (Duchaine et al., 2006).

### **Sequence of primer pairs**

#### **qRT-PCR**

##### ***Eri-5 mRNA:***

5' GCGAAATGGAGTGGGAATACAC 3' and

5' CGAATCTGCGAGAATTGCAG 3'

##### ***Rde-1 mRNA:***

5' GGAATGAGCCAAGATGAAGTC 3' and

5' GCATAATGAACCGGAACAGG 3'

##### ***actin:***

5' CGTGTTCCCATCCATTGTCTG 3' and

5' AGTTGGTGACGATACCGTGCTC 3'

#### ***C40A11.10 (26-G) qRT-PCR:***

Universal: 5' CATGATCAGCTGGGCCAAGA 3'

GSP: 5' CATGATCAGCTGGGCCAAGACGGAATCTCA 3'

LNA (26-G): 5' G+CA+AGATGGAAAAG 3'

#### ***X-cluster qRT-PCR:***

GSP: 5' CATGATCAGCTGGGCCAAGACTCATACCG 3'

LNA (X): 5' G+AA+TAGATACGCGG 3'

## **Cloning**

*Eri-5* cDNA:

pCalkc:

5' ttttggatccTGCTCTCGGAGGAGCCCTACG 3'

5' ttttggatccTCCGCTATCCTTATCGTCGC 3'

pET42 and pET28:

5' ttttggatccATGCTCTCGGAGGAGCCCTACG 3'

*Eri-3* cDNA:

pET28/3XFlag:

5' CTCGAGTGCAACCCGTTCTTGTAATAG 3'

5' CTCGAGTCATTCAATAAACGGGGATTCTGTAC 3'

*Ekl-1* cDNA:

pCalkc:

5' agatct TG ATT GCG GTT GGA CTC CG 3'

5' agatct ATT TGG CCA TTC GAT TGG CTC 3'

**Starfire probe sequences:**

***C40A11.10:***

5' CGG AAT CTC AAA CTT TTC CAT CTT GC/StarFire 3'

***X-cluster:*** (mix of these two probes)

5' CTC ATA CCG CGT ATC TAT TC/StarFire 3'

5' CGC GTA TCT ATT CAA TTG AAT/StarFire 3'
